# Supplementary material for: Comprehensive DNA methylation analysis of the Aedes aegypti genome
Source: PubMed Central journal article supplement (PMC5090363; doi:10.1038/srep36444), 2016-11-02
Supplement: srep36444-s1.pdf [file srep36444-s1.pdf]

## **Supplementary information**

### **Comprehensive DNA methylation analysis of the *Aedes aegypti* genome**

Cassandra Falckenhayn, Vitor Coutinho Carneiro, Anderson de Mendonça Amarante,  
Katharina Schmid, Katharina Hanna, Seokyoung Kang, Mark Helm, George Dimopoulos,  
Marcelo Rosado Fantappié, and Frank Lyko

#### **Contents:**

Supplementary Figures 1 and 2

Supplementary Table 1

Supplementary references

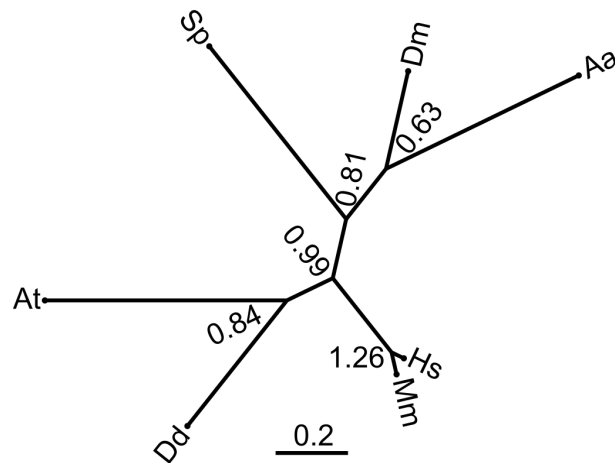

**Figure S1.** Phylogenetic tree of the Dnmt2 proteins from *Aedes aegypti* (Aa, XP\_001657555), *Drosophila melanogaster* (Dm, NP\_477475), *Homo sapiens* (Hs, NP\_004403), *Mus musculus* (Mm, O55055), *Dictyostelium discoideum* (Dd, Q54JH6), *Arabidopsis thaliana* (At, OAO96001) and *Schizosaccharomyces pombe* (Sp, P40999). The multiple sequence alignment of the conserved amino acid sequence motifs was reduced to the homologous parts<sup>1</sup> and the phylogenetic tree was constructed by the Maximum-Likelihood method using PhyML 3.0 (ref. 2).

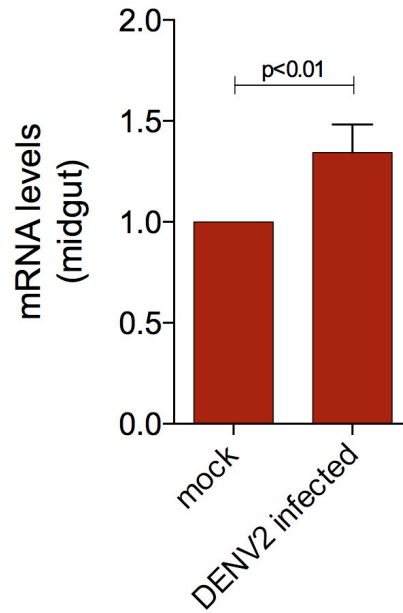

**Figure S2.** Induction of AaDnmt2 expression in midguts from DENV2-infected mosquitoes. mRNA expression levels were determined by qRT-PCR in multiple biological replicates from mock-infected and DENV2-infected mosquitoes. Virus infection was confirmed by plaque assays, statistical significance was determined by a Mann-Whitney test.

**Supplementary Table 1.** Primer sequences.

| Primer                        | 5'-3' sequence          |
|-------------------------------|-------------------------|
| Aedes_DNMT2_qRT-PCR_FW (863)  | TGAGAAGTCTGAGAGTCCGATAC |
| Aedes_DNMT2_qRT-PCR_RV (993)  | ATTGATGCTGTTGCCAAGAAC   |
| Aedes_METTL4_qRT-PCR_FW (222) | CCAATTCGCCAAGTCACATTG   |
| Aedes_METTL4_qRT-PCR_RV (325) | CTCATTGAAGGCACAAACCG    |
| Aedes_TET_qRT-PCR_FW (2278)   | CTTGGTCTCGGTGGCTATC     |
| Aedes_TET_qRT-PCR_RV (2395)   | TGATGTGGAAGGTGTGGATTG   |
| AaRP49_qPCR_FW                | GCTATGACAAGCTTGCCCCCA   |
| AaRP49_qPCR_RV                | TCATCAGCACCTCCAGCTC     |
| Aedes_Asp_FW (454)            | TGGTAGTATAGTGGTAAGTAT   |
| Aedes_Asp_RV (454)            | CTCCCCAACAAAAATCA       |
| Aedes_Gly_FW (454)            | GTGGTTTAGTGGTAGAATGT    |
| Aedes_Gly_RV (454)            | TACATCAATCAAAAATCA      |

### Supplementary references

1. Jurkowski, T. P. & Jeltsch, A. On the evolutionary origin of eukaryotic DNA methyltransferases and Dnmt2. *PLoS ONE* **6**, e28104 (2011).
2. Guindon, S. *et al.* New algorithms and methods to estimate maximum-likelihood phylogenies: assessing the performance of PhyML 3.0. *Syst. Biol.* **59**, 307-321 (2010).
